# Supplementary material for: CO2 conversion over Cu–Mo2C catalysts: effect of the Cu promoter and preparation method
Source: Royal Society of Chemistry journal article supplement (doi:10.1039/d0cy02021d), 2020-12-10
Supplement: d0cy02021d1.pdf [file d0cy02021d1.pdf]

# **CO<sub>2</sub> conversion over Cu-Mo<sub>2</sub>C catalysts: Effect of Cu promoter and preparation method**

**Eleni Heracleous** <sup>1,2,\*</sup>

<sup>1</sup> Chemical Process & Energy Resources Institute (CPERI), Centre for Research and Technology Hellas (CERTH), Greece

<sup>2</sup> School of Science and Technology, International Hellenic University, Greece

**Vasiliki Koidi** <sup>1,2</sup>

<sup>1</sup> Chemical Process & Energy Resources Institute (CPERI), Centre for Research and Technology Hellas (CERTH), Greece

<sup>2</sup> School of Science and Technology, International Hellenic University, Greece

and

**Angelos A. Lappas** <sup>1</sup>

<sup>1</sup> Chemical Process & Energy Resources Institute (CPERI),  
Centre for Research and Technology Hellas (CERTH), Greece

**Electronic Supporting Information**

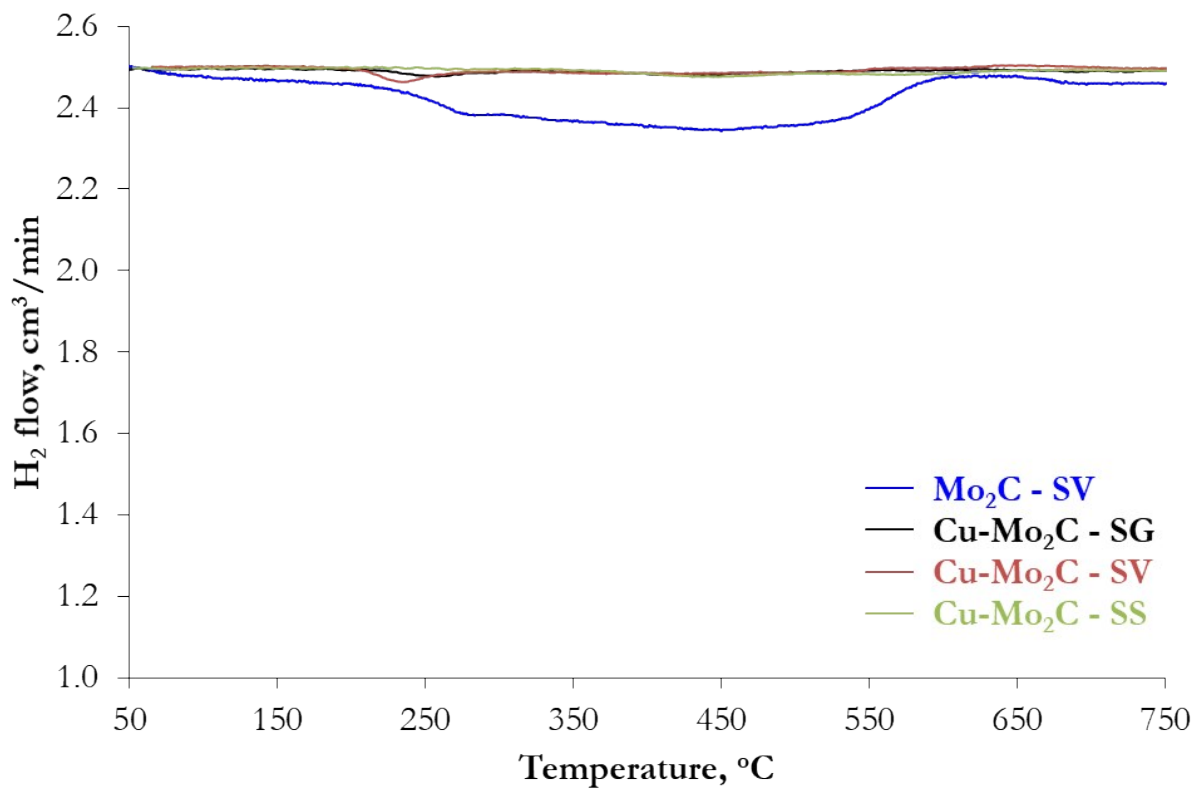

**Figure S1.** TPR-H<sub>2</sub> hydrogen consumption profiles of the Mo<sub>2</sub>C and Cu-Mo<sub>2</sub>C catalysts.

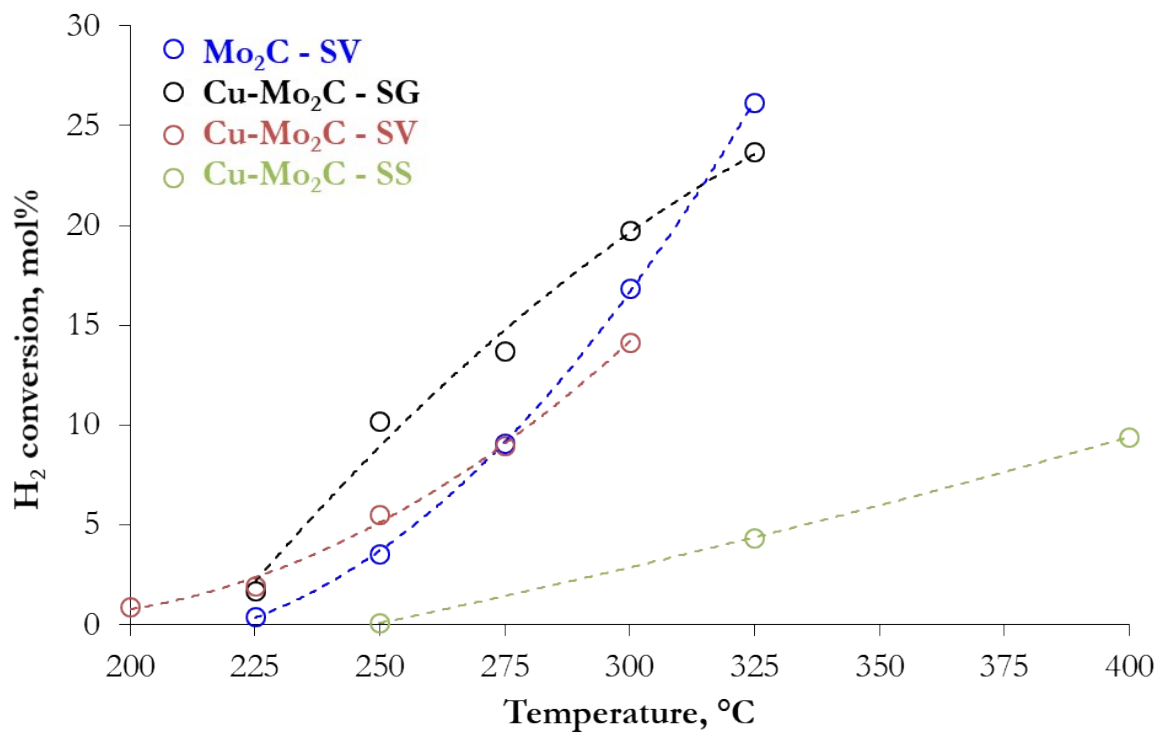

**Figure S2.** Conversion of H<sub>2</sub> versus temperature over the Mo<sub>2</sub>C and Cu-Mo<sub>2</sub>C catalysts (reaction conditions: P = 45 bar, H<sub>2</sub>/CO<sub>2</sub> ratio = 3, W/F = 0.3 g.s/cm<sup>3</sup>).

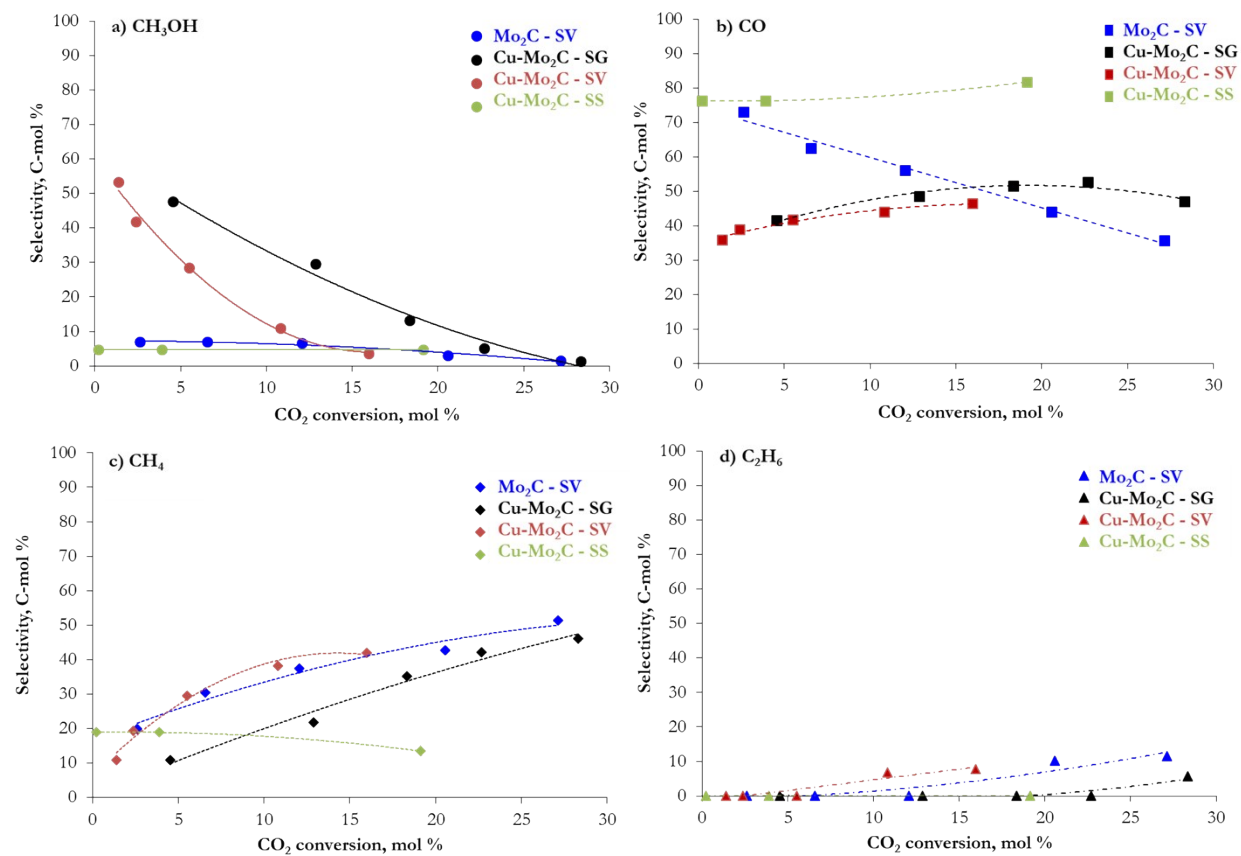

**Figure S3.** Selectivity to (a) CH<sub>3</sub>OH, (b) CO, (c) CH<sub>4</sub> and (d) C<sub>2</sub>H<sub>6</sub> versus CO<sub>2</sub> conversion over the Mo<sub>2</sub>C and Cu-Mo<sub>2</sub>C catalysts (reaction conditions: P = 45 bar, H<sub>2</sub>/CO<sub>2</sub> ratio = 3, W/F = 0.3 g.s/cm<sup>3</sup>).

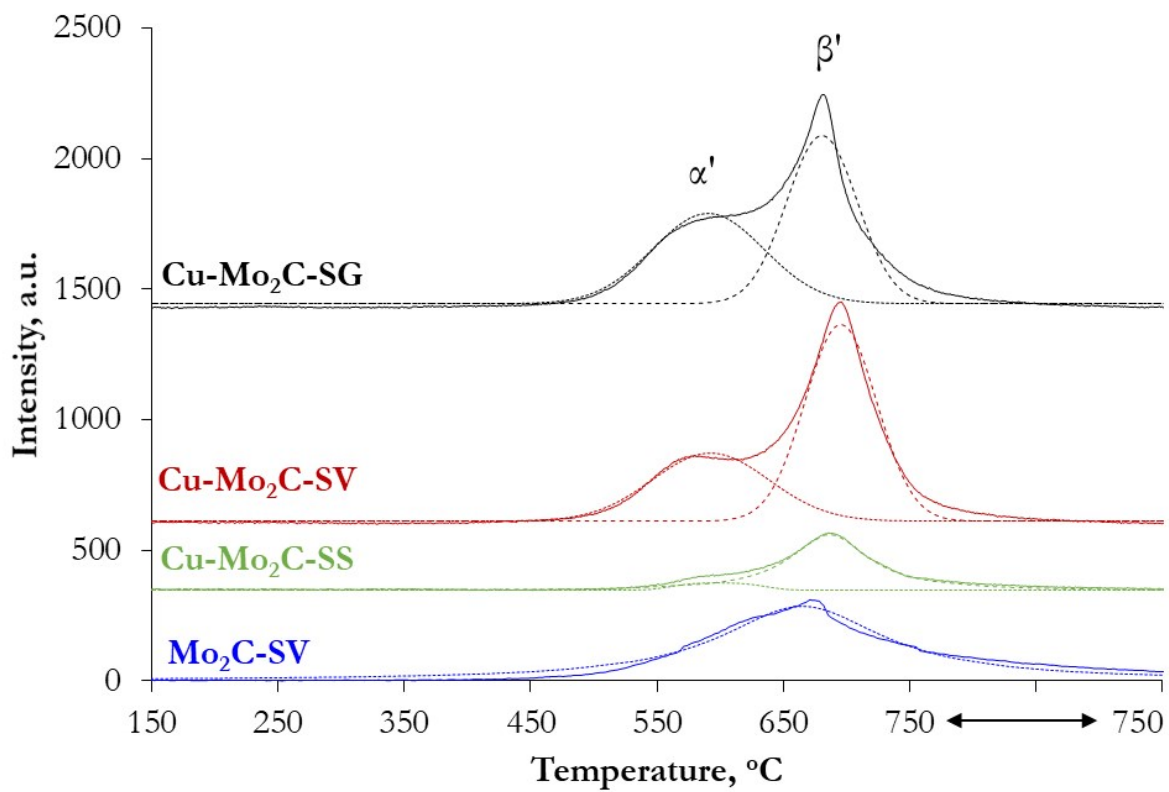

**Figure S4.** Deconvoluted desorption profiles of CO as a function of temperature following CO<sub>2</sub> adsorption on the Mo<sub>2</sub>C and Cu-Mo<sub>2</sub>C catalysts.

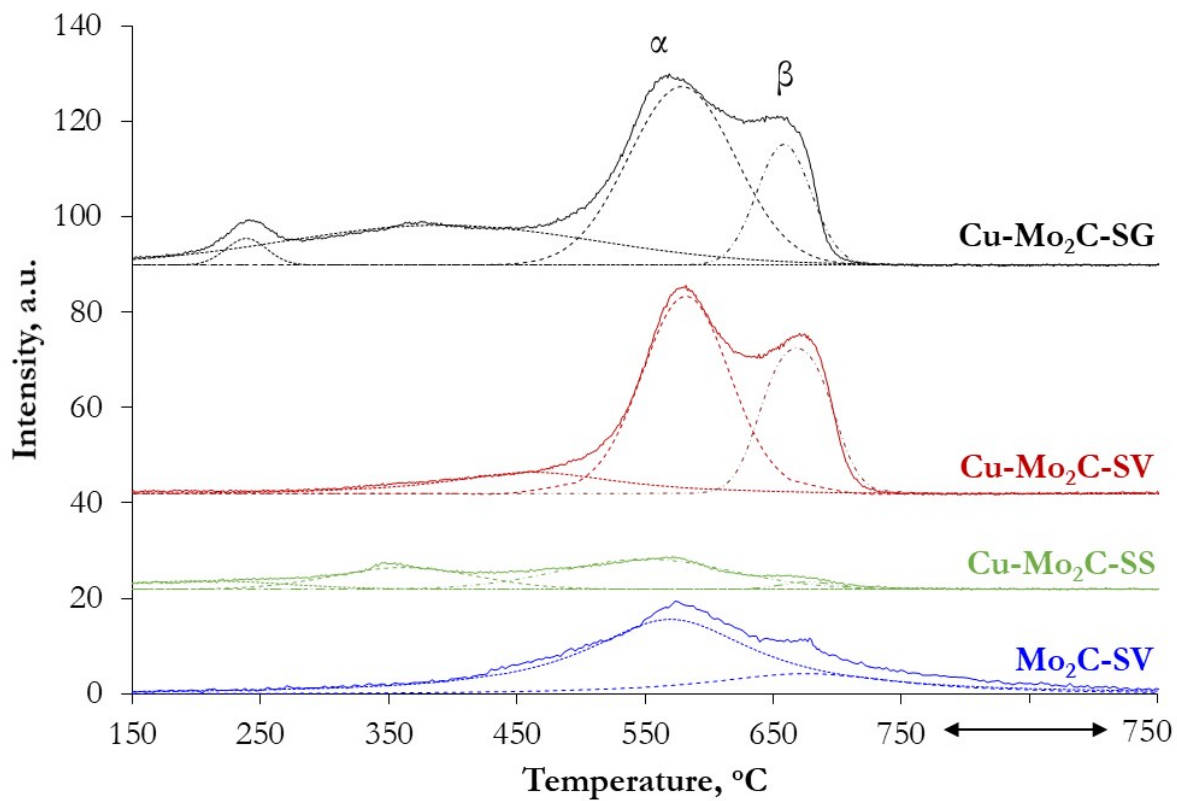

**Figure S5.** Deconvoluted desorption profiles of CO<sub>2</sub> as a function of temperature following CO<sub>2</sub> adsorption on the Mo<sub>2</sub>C and Cu-Mo<sub>2</sub>C catalysts.

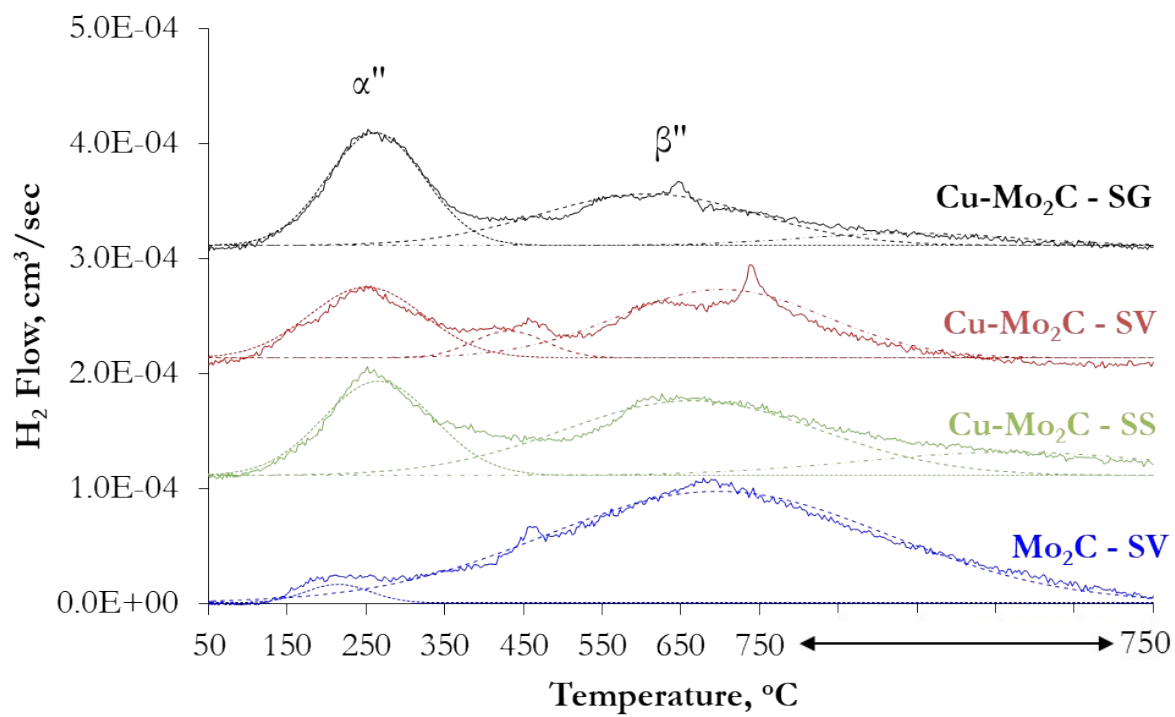

**Figure S6.** Deconvoluted desorption profiles of H<sub>2</sub> as a function of temperature following H<sub>2</sub> adsorption on the Mo<sub>2</sub>C and Cu-Mo<sub>2</sub>C catalysts.
